# Supplementary material
Source: Elsevier journal article supplement (https://www.sciencedirect.com/science/article/pii/S0870255115003200)
Supplement: mmc1 [file S0870255115003200:mmc1.docx]

**Suppl. Table.** Comparison of adherence to the guideline-directed medical therapy (%).

|  | Present Study | ACTION29 | FAST-MI 201030 | EHS-ACS-II31 |
| --- | --- | --- | --- | --- |
| Acetylsalicylic acid | 96 | 97 | 96 | 95 |
| Clopidogrel | 92 | 74 | 87 | 67 |
| ACE-I / ARB | 78 | 70 | 62 | 70 |
| Beta blocker | 89 | 95 | 78 | 83 |
| Statin | 84 | 88 | 85 | 74 |

The values are rounded to the nearest integer. ACE-I = Angiotensin Converting Enzyme Inhibitor; ACTION = Acute Coronary Treatment and Intervention Outcomes Network Registry; ARB = Angiotensin Receptor Blocker; EHS-ACS-II= Euro Heart Survey on Acute Coronary Syndromes-II; FAST-MI 2010 = French Registry on Acute ST-elevation and Non-ST-Elevation Myocardial Infarction 2010 Registry.
